# Supplementary material
Source: PubMed Central journal article supplement (PMC4505255)
Supplement: AAC.05048-14_zac008154191so1.pdf [file AAC.05048-14_zac008154191so1.pdf]

**TABLE S1** The bactericidal effects of olanexidine against various bacterial strains by exposure time and minimal bactericidal concentration (MBC)\*

| Bacterial Strain                                            | Minimal bactericidal concentration, µg/ml |      |       |                           |       |       |                 |       |       |
|-------------------------------------------------------------|-------------------------------------------|------|-------|---------------------------|-------|-------|-----------------|-------|-------|
|                                                             | Olanexidine gluconate                     |      |       | Chlorhexidine digluconate |       |       | Povidone iodine |       |       |
|                                                             | 30 s                                      | 60 s | 180 s | 30 s                      | 60 s  | 180 s | 30 s            | 60 s  | 180 s |
| <i>Kocuria varians</i> NBRC 3765                            | 54.3                                      | 27.1 | 13.6  | >313                      | >313  | 39.1  | 391             | 195   | 195   |
| <i>Kytococcus sedentarius</i> NBRC 15357                    | 434                                       | 109  | 27.1  | 39.1                      | 9.8   | 9.8   | 781             | 391   | 391   |
| <i>Micrococcus luteus</i> NBRC 12992                        | 54.3                                      | 27.1 | 13.6  | >313                      | >313  | 313   | 781             | 391   | 195   |
| <i>Staphylococcus aureus</i> ATCC 6538                      | 434                                       | 217  | 109   | >1250                     | >1250 | >1250 | 391             | 195   | 195   |
| <i>Staphylococcus aureus</i> ATCC 6538P                     | 869                                       | 434  | 434   | >1250                     | >1250 | >1250 | 781             | 391   | 391   |
| <i>Staphylococcus aureus</i> ATCC 29213                     | 869                                       | 434  | 109   | >1250                     | >1250 | >1250 | 391             | 391   | 195   |
| <i>Staphylococcus aureus</i> ATCC 33591 (MRSA) <sup>†</sup> | 434                                       | 109  | 109   | 2500                      | 1250  | 156   | 391             | 391   | 195   |
| <i>Staphylococcus aureus</i> ATCC 43300 (MRSA)              | 1740                                      | 869  | 434   | >1250                     | >1250 | >1250 | 781             | 391   | 391   |
| <i>Staphylococcus capitis</i> ATCC 27840                    | 54.3                                      | 13.6 | ≤6.8  | >39.1                     | >39.1 | >39.1 | ≤48.8           | ≤48.8 | ≤48.8 |
| <i>Staphylococcus epidermidis</i> ATCC 12228                | 217                                       | 109  | 54.3  | 78.1                      | 39.1  | 19.5  | 195             | 195   | 97.7  |
| <i>Staphylococcus haemolyticus</i> ATCC 29970               | 27.1                                      | 13.6 | 13.6  | 1250                      | 625   | 19.5  | 391             | 391   | 391   |
| <i>Staphylococcus hominis</i> ATCC 27844                    | 217                                       | 109  | 27.1  | >313                      | >313  | >313  | 391             | 391   | 391   |
| <i>Staphylococcus saprophyticus</i> ATCC 15305              | 13.6                                      | ≤6.8 | ≤6.8  | 39.1                      | 39.1  | 19.5  | 195             | 195   | 195   |
| <i>Staphylococcus sciuri</i> ATCC 29060                     | 27.1                                      | 13.6 | ≤6.8  | >1250                     | 1250  | 78.1  | 391             | 195   | ≤48.8 |
| <i>Staphylococcus simulans</i> ATCC 27851                   | 27.1                                      | 13.6 | 13.6  | >1250                     | 1250  | 313   | 391             | 391   | 97.7  |

| Bacterial Strain                              | Minimal bactericidal concentration, µg/ml |      |       |                           |       |       |                 |        |       |
|-----------------------------------------------|-------------------------------------------|------|-------|---------------------------|-------|-------|-----------------|--------|-------|
|                                               | Olanexidine gluconate                     |      |       | Chlorhexidine digluconate |       |       | Povidone iodine |        |       |
|                                               | 30 s                                      | 60 s | 180 s | 30 s                      | 60 s  | 180 s | 30 s            | 60 s   | 180 s |
| <i>Staphylococcus warneri</i> ATCC 27836      | 217                                       | 54.3 | 13.6  | >313                      | >313  | >313  | 781             | 195    | ≤48.8 |
| <i>Staphylococcus xylosus</i> ATCC 29971      | 217                                       | 27.1 | ≤6.8  | 2500                      | 1250  | 78.1  | 391             | 391    | 97.7  |
| <i>Streptococcus agalactiae</i> ATCC 12386    | 54.3                                      | 27.1 | 13.6  | >625                      | >625  | >625  | 781             | 781    | 391   |
| <i>Streptococcus bovis</i> ATCC 33317         | 109                                       | 27.1 | ≤6.8  | >1250                     | >1250 | >1250 | 781             | 391    | 195   |
| <i>Streptococcus pneumoniae</i> ATCC 49619    | 27.1                                      | 27.1 | 13.6  | >2500                     | >2500 | 313   | 391             | 97.7   | 97.7  |
| <i>Streptococcus pyogenes</i> ATCC 19615      | 27.1                                      | 13.6 | 27.1  | >156                      | >156  | >156  | 391             | 391    | 97.7  |
| <i>Enterococcus avium</i> ATCC 14025          | 54.3                                      | 13.6 | 13.6  | >1250                     | 78.1  | 9.8   | 391             | 195    | 97.7  |
| <i>Enterococcus avium</i> ATCC 49462          | 217                                       | 217  | 54.3  | >2500                     | >2500 | 2500  | 781             | 781    | 391   |
| <i>Enterococcus avium</i> ATCC 49463          | 54.3                                      | 13.6 | 13.6  | >1250                     | >1250 | >1250 | 781             | 391    | 195   |
| <i>Enterococcus avium</i> ATCC 49465          | 217                                       | 109  | 27.1  | >1250                     | >1250 | >1250 | 781             | 781    | 391   |
| <i>Enterococcus casseliflavus</i> ATCC 12817  | 27.1                                      | 13.6 | 13.6  | >2500                     | >2500 | >2500 | >50000          | >50000 | 391   |
| <i>Enterococcus casseliflavus</i> ATCC 12818  | 217                                       | 54.3 | 13.6  | >5000                     | >5000 | >5000 | >50000          | 50000  | 195   |
| <i>Enterococcus casseliflavus</i> ATCC 700668 | 54.3                                      | 54.3 | ≤6.8  | 5000                      | 5000  | 5000  | >50000          | 25000  | 391   |
| <i>Enterococcus casseliflavus</i> NBRC 100679 | 27.1                                      | 13.6 | 13.6  | >2500                     | >2500 | >2500 | 50000           | 391    | 195   |
| <i>Enterococcus cecorum</i> ATCC BAA-597      | 109                                       | 27.1 | 13.6  | >1250                     | >1250 | >1250 | 781             | 391    | 195   |
| <i>Enterococcus dispar</i> NBRC 100678        | 13.6                                      | 13.6 | ≤6.8  | >1250                     | >1250 | >1250 | 781             | 781    | 391   |
| <i>Enterococcus faecalis</i> ATCC 29212       | 54.3                                      | 13.6 | ≤6.8  | >5000                     | >5000 | 5000  | >50000          | >50000 | 1560  |

| Bacterial Strain                                           | Minimal bactericidal concentration, µg/ml |      |       |                           |       |       |                 |        |       |
|------------------------------------------------------------|-------------------------------------------|------|-------|---------------------------|-------|-------|-----------------|--------|-------|
|                                                            | Olanexidine gluconate                     |      |       | Chlorhexidine digluconate |       |       | Povidone iodine |        |       |
|                                                            | 30 s                                      | 60 s | 180 s | 30 s                      | 60 s  | 180 s | 30 s            | 60 s   | 180 s |
| <i>Enterococcus faecalis</i> ATCC 49383                    | 54.3                                      | 27.1 | 13.6  | >5000                     | >5000 | >5000 | 50000           | 50000  | ≤48.8 |
| <i>Enterococcus faecalis</i> ATCC 49384                    | 109                                       | 54.3 | 13.6  | >5000                     | >5000 | >5000 | >50000          | >50000 | 195   |
| <i>Enterococcus faecalis</i> ATCC 49532                    | 54.3                                      | 27.1 | 13.6  | >5000                     | >5000 | >5000 | 50000           | 50000  | 97.7  |
| <i>Enterococcus faecalis</i> ATCC 49533                    | 54.3                                      | 13.6 | 13.6  | >5000                     | >5000 | >5000 | 50000           | 50000  | 391   |
| <i>Enterococcus faecalis</i> ATCC 51299 (VRE)              | 54.3                                      | 27.1 | ≤6.8  | >5000                     | >5000 | >5000 | >50000          | 3130   | 781   |
| <i>Enterococcus faecalis</i> ATCC 51575 (VRE) <sup>†</sup> | 54.3                                      | 13.6 | 13.6  | >5000                     | >5000 | >5000 | 50000           | 50000  | 391   |
| <i>Enterococcus faecalis</i> ATCC 700802 (VRE)             | 54.3                                      | 27.1 | 13.6  | >5000                     | >5000 | >5000 | 50000           | 50000  | 391   |
| <i>Enterococcus faecalis</i> NBRC 100480                   | 27.1                                      | 13.6 | 13.6  | >5000                     | >5000 | 5000  | 50000           | 781    | 391   |
| <i>Enterococcus faecium</i> ATCC 35667                     | 109                                       | ≤6.8 | ≤6.8  | 5000                      | 5000  | 5000  | >50000          | >50000 | 1560  |
| <i>Enterococcus faecium</i> ATCC 49224                     | 109                                       | 13.6 | 13.6  | >1250                     | >1250 | >1250 | 391             | 195    | ≤48.8 |
| <i>Enterococcus faecium</i> ATCC 49225                     | 27.1                                      | 13.6 | 27.1  | >1250                     | >1250 | >1250 | 781             | 195    | ≤48.8 |
| <i>Enterococcus faecium</i> ATCC 51558                     | 13.6                                      | 13.6 | 13.6  | 5000                      | 1250  | 1250  | 195             | 97.7   | ≤48.8 |
| <i>Enterococcus faecium</i> ATCC 51559 (VRE)               | 13.6                                      | 13.6 | 13.6  | 5000                      | 5000  | 2500  | 781             | 195    | 97.7  |
| <i>Enterococcus faecium</i> ATCC 700221 (VRE)              | 27.1                                      | 27.1 | 13.6  | >5000                     | >5000 | 5000  | 781             | 391    | 97.7  |
| <i>Enterococcus faecium</i> NBRC 100485                    | 217                                       | 27.1 | ≤6.8  | >5000                     | >5000 | >5000 | 50000           | 391    | 391   |
| <i>Enterococcus faecium</i> NBRC 100602                    | 54.3                                      | 13.6 | 13.6  | >2500                     | >2500 | >2500 | 50000           | 391    | ≤48.8 |
| <i>Enterococcus flavescens</i> ATCC 49997                  | 13.6                                      | 13.6 | 13.6  | >2500                     | >2500 | >2500 | 781             | 781    | 391   |

| Bacterial Strain                               | Minimal bactericidal concentration, µg/ml |      |       |                           |       |       |                 |       |       |
|------------------------------------------------|-------------------------------------------|------|-------|---------------------------|-------|-------|-----------------|-------|-------|
|                                                | Olanexidine gluconate                     |      |       | Chlorhexidine digluconate |       |       | Povidone iodine |       |       |
|                                                | 30 s                                      | 60 s | 180 s | 30 s                      | 60 s  | 180 s | 30 s            | 60 s  | 180 s |
| <i>Enterococcus flavescens</i> ATCC 49998      | 54.3                                      | 13.6 | 13.6  | >2500                     | >2500 | >2500 | 50000           | 1560  | 781   |
| <i>Enterococcus gallinarum</i> ATCC 49609      | 217                                       | 54.3 | 13.6  | >5000                     | >5000 | >5000 | >50000          | 50000 | 781   |
| <i>Enterococcus gallinarum</i> NBRC 100675     | 109                                       | 54.3 | 27.1  | >5000                     | 5000  | 5000  | 50000           | 781   | 391   |
| <i>Enterococcus gilvus</i> NBRC 100696         | 434                                       | 109  | 54.3  | >1250                     | >1250 | >1250 | 781             | 781   | 391   |
| <i>Enterococcus pallens</i> NBRC 100697        | 434                                       | 217  | 54.3  | >625                      | >625  | >625  | 781             | 781   | 781   |
| <i>Enterococcus raffinosus</i> NBRC 100492     | 109                                       | 54.3 | 13.6  | >1250                     | >1250 | >1250 | 1560            | 781   | 781   |
| <i>Brevibacterium epidermidis</i> NBRC 14811   | 13.6                                      | ≤6.8 | ≤6.8  | 1250                      | 313   | 19.5  | 781             | 391   | 97.7  |
| <i>Corynebacterium diphtheriae</i> ATCC 11913  | 109                                       | 54.3 | 13.6  | >313                      | >313  | >313  | 781             | 391   | 391   |
| <i>Corynebacterium jeikeium</i> ATCC 43734     | 109                                       | 27.1 | 27.1  | >625                      | >625  | 625   | 195             | 195   | 97.7  |
| <i>Corynebacterium minutissimum</i> NBRC 15361 | 54.3                                      | 54.3 | 13.6  | >625                      | 625   | 625   | 97.7            | ≤48.8 | 97.7  |
| <i>Corynebacterium xerosis</i> NBRC 16721      | 109                                       | 109  | ≤6.8  | >156                      | 156   | 78.1  | 391             | 195   | 97.7  |
| <i>Listeria monocytogenes</i> ATCC 19115       | 869                                       | 54.3 | ≤6.8  | >2500                     | >2500 | >2500 | 781             | 391   | 195   |
| <i>Propionibacterium acnes</i> ATCC 11827      | 1740                                      | 1740 | 109   | >313                      | >313  | 156   | 781             | 781   | 391   |
| <i>Propionibacterium avidum</i> ATCC 49753     | 27.1                                      | 13.6 | 13.6  | 625                       | 313   | 78.1  | 781             | 781   | 781   |
| <i>Propionibacterium granulosum</i> ATCC 25746 | ≤6.8                                      | ≤6.8 | ≤6.8  | 19.5                      | 19.5  | 9.8   | 781             | 781   | 781   |
| <i>Achromobacter xylosoxidans</i> NBRC 15126   | 434                                       | 109  | 27.1  | >5000                     | >5000 | 2500  | 391             | 391   | 195   |
| <i>Acinetobacter baumannii</i> ATCC 19606      | 13.6                                      | 13.6 | ≤6.8  | 313                       | 78.1  | 19.5  | 195             | 97.7  | 97.7  |

| Bacterial Strain                              | Minimal bactericidal concentration, µg/ml |       |       |                           |       |       |                 |       |       |
|-----------------------------------------------|-------------------------------------------|-------|-------|---------------------------|-------|-------|-----------------|-------|-------|
|                                               | Olanexidine gluconate                     |       |       | Chlorhexidine digluconate |       |       | Povidone iodine |       |       |
|                                               | 30 s                                      | 60 s  | 180 s | 30 s                      | 60 s  | 180 s | 30 s            | 60 s  | 180 s |
| <i>Acinetobacter calcoaceticus</i> NBRC 12552 | 54.3                                      | 27.1  | 13.6  | 1250                      | 625   | 19.5  | 195             | 195   | 97.7  |
| <i>Acinetobacter</i> species ATCC 49137       | 27.1                                      | ≤6.8  | ≤6.8  | 156                       | 19.5  | 19.5  | 391             | 195   | ≤48.8 |
| <i>Alcaligenes faecalis</i> ATCC 8750         | 869                                       | 434   | 54.3  | 5000                      | 5000  | 1250  | 3130            | 781   | 391   |
| <i>Bacteroides fragilis</i> ATCC 25285        | 54.3                                      | 27.1  | 13.6  | 313                       | 156   | 156   | 781             | 781   | 781   |
| <i>Burkholderia cepacia</i> ATCC 25416        | >6950                                     | >6950 | 434   | >5000                     | >5000 | 625   | 391             | 391   | 195   |
| <i>Burkholderia cepacia</i> ATCC 35254        | >6950                                     | 1740  | 434   | >5000                     | >5000 | 625   | 391             | 391   | 195   |
| <i>Citrobacter freundii</i> ATCC 8090         | 109                                       | 54.3  | 13.6  | 1250                      | 156   | 39.1  | 781             | 391   | 391   |
| <i>Enterobacter aerogenes</i> ATCC 13048      | 54.3                                      | 13.6  | ≤6.8  | 625                       | 78.1  | 19.5  | 391             | 195   | 195   |
| <i>Enterobacter cloacae</i> ATCC 13047        | 109                                       | 109   | 27.1  | 1250                      | 156   | 78.1  | 781             | 781   | 391   |
| <i>Escherichia coli</i> ATCC 11229            | 217                                       | 54.3  | 27.1  | 625                       | 313   | 39.1  | 781             | 391   | 195   |
| <i>Escherichia coli</i> ATCC 25922            | 54.3                                      | 27.1  | 13.6  | 39.1                      | 19.5  | 19.5  | 391             | 195   | 195   |
| <i>Klebsiella pneumoniae</i> ATCC 13883       | 54.3                                      | 27.1  | 13.6  | 2500                      | 313   | 156   | 781             | 391   | 391   |
| <i>Legionella pneumophila</i> ATCC 33152      | 13.6                                      | 13.6  | 13.6  | >78.1                     | >78.1 | >78.1 | 195             | 195   | 195   |
| <i>Moraxella catarrhalis</i> ATCC 49143       | 13.6                                      | ≤6.8  | ≤6.8  | 313                       | 156   | 19.5  | ≤48.8           | ≤48.8 | ≤48.8 |
| <i>Morganella morganii</i> ATCC 25830         | 217                                       | 27.1  | 13.6  | 39.1                      | 19.5  | 9.8   | 195             | 97.7  | ≤48.8 |
| <i>Pantoea agglomerans</i> NBRC 102470        | 217                                       | 54.3  | 27.1  | 313                       | 156   | 39.1  | 391             | 391   | 195   |
| <i>Proteus hauseri</i> ATCC 13315             | 54.3                                      | 13.6  | ≤6.8  | 156                       | 39.1  | 39.1  | 391             | 195   | 97.7  |

| Bacterial Strain                               | Minimal bactericidal concentration, µg/ml |      |       |                           |       |       |                 |      |       |
|------------------------------------------------|-------------------------------------------|------|-------|---------------------------|-------|-------|-----------------|------|-------|
|                                                | Olanexidine gluconate                     |      |       | Chlorhexidine digluconate |       |       | Povidone iodine |      |       |
|                                                | 30 s                                      | 60 s | 180 s | 30 s                      | 60 s  | 180 s | 30 s            | 60 s | 180 s |
| <i>Proteus mirabilis</i> ATCC 29245            | 869                                       | 217  | 54.3  | >5000                     | 156   | 39.1  | 391             | 195  | 97.7  |
| <i>Providencia rettgeri</i> ATCC 9250          | 54.3                                      | 27.1 | 13.6  | 5000                      | 2500  | 156   | 391             | 391  | 391   |
| <i>Providencia stuartii</i> ATCC 33672         | 869                                       | 109  | 54.3  | >5000                     | >5000 | 2500  | 781             | 781  | 391   |
| <i>Pseudomonas aeruginosa</i> ATCC 15442       | 54.3                                      | 27.1 | 13.6  | >5000                     | 1250  | 78.1  | 781             | 391  | 195   |
| <i>Pseudomonas aeruginosa</i> ATCC 27853       | 54.3                                      | 13.6 | 13.6  | 39.1                      | 19.5  | 19.5  | 391             | 391  | 391   |
| <i>Pseudomonas fluorescens</i> ATCC 49838      | ≤6.8                                      | ≤6.8 | ≤6.8  | 78.1                      | 19.5  | ≤4.9  | 391             | 391  | 195   |
| <i>Pseudomonas putida</i> ATCC 49128           | 27.1                                      | 27.1 | 13.6  | 156                       | 19.5  | 9.8   | 781             | 781  | 391   |
| <i>Pseudomonas stutzeri</i> NBRC 14165         | 13.6                                      | 13.6 | 13.6  | 156                       | 78.1  | 9.8   | 195             | 195  | 97.7  |
| <i>Salmonella enteritidis</i> ATCC 13076       | 54.3                                      | 27.1 | ≤6.8  | 78.1                      | 39.1  | 19.5  | 391             | 195  | 195   |
| <i>Salmonella paratyphi</i> ATCC 9150          | 27.1                                      | 13.6 | 13.6  | 156                       | 156   | 39.1  | 391             | 391  | 195   |
| <i>Salmonella typhimurium</i> ATCC 14028       | 54.3                                      | 54.3 | ≤6.8  | 5000                      | 5000  | 156   | 781             | 391  | 391   |
| <i>Serratia liquefaciens</i> NBRC 12979        | 54.3                                      | 27.1 | 13.6  | 1250                      | 313   | 39.1  | 781             | 781  | 781   |
| <i>Serratia marcescens</i> ATCC 14756          | 54.3                                      | 54.3 | 13.6  | 5000                      | 78.1  | 39.1  | 391             | 391  | 195   |
| <i>Shigella flexneri</i> ATCC 12022            | 217                                       | 109  | 27.1  | >625                      | 156   | 19.5  | 781             | 391  | 97.7  |
| <i>Shigella sonnei</i> ATCC 25931              | 54.3                                      | 27.1 | ≤6.8  | 1250                      | 78.1  | 19.5  | 391             | 195  | 195   |
| <i>Stenotrophomonas maltophilia</i> ATCC 13637 | 109                                       | 54.3 | 13.6  | 5000                      | 625   | 19.5  | 391             | 195  | 97.7  |
| <i>Yersinia enterocolitica</i> ATCC 27729      | 217                                       | 54.3 | 13.6  | 625                       | 39.1  | 19.5  | 391             | 195  | 97.7  |

\*The ranges in Table 1 are based on these data.

†These data were collected in the current study but are included in Reference 7, which was published first.

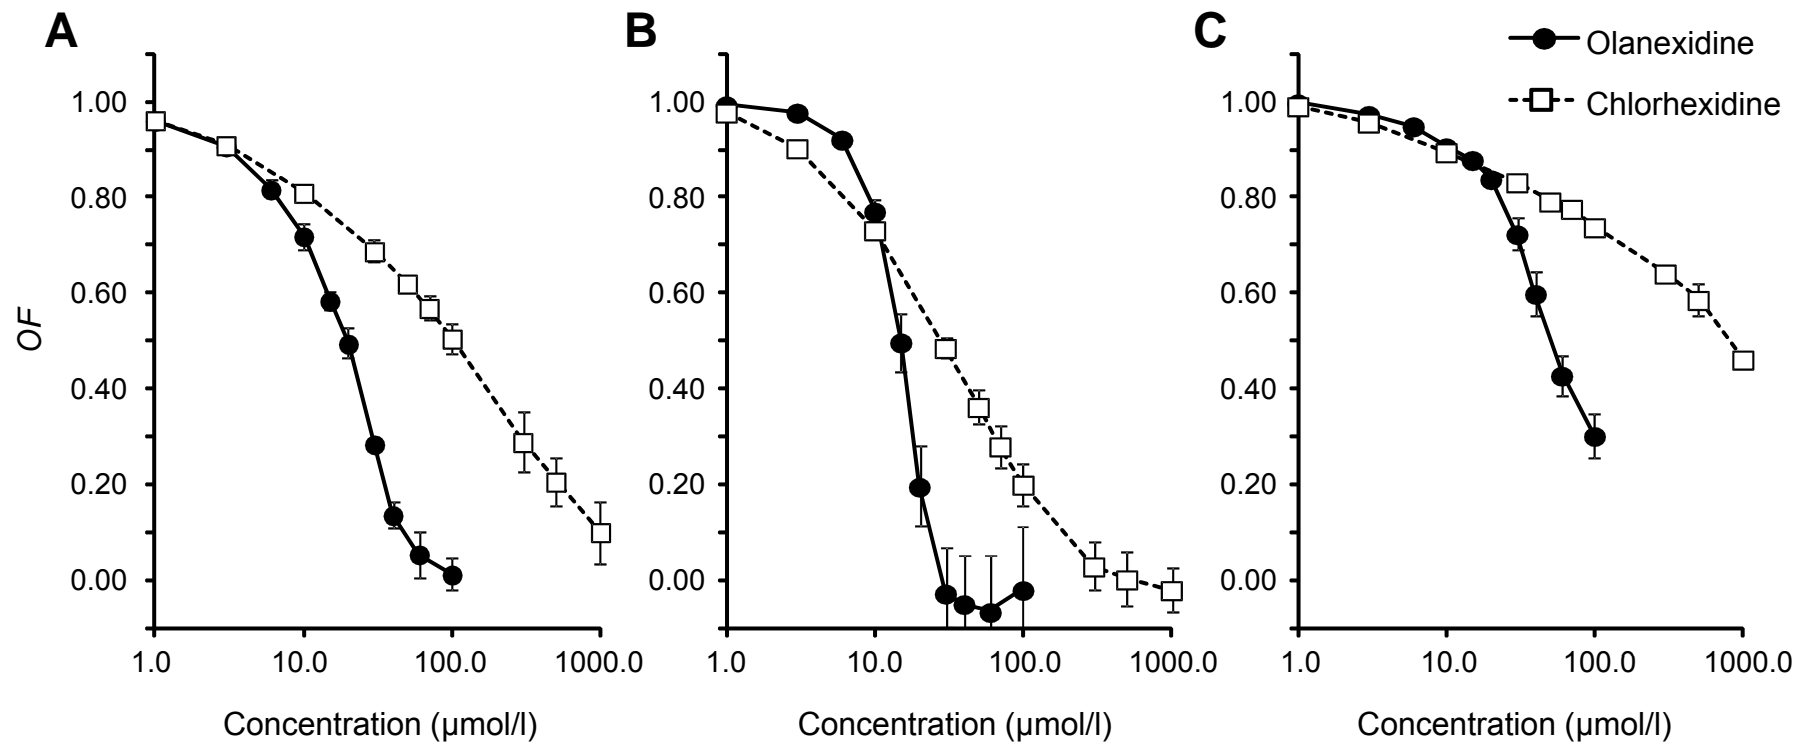

**FIG S1** Displacements of (A) LPS-, (B) Lipid A-, and (C) LTA-bound BODIPY TR cadaverine (BC) by olanexidine (●) and chlorhexidine (□). The BC displacement, shown by dequenching of the fluorescence intensity, is quantified by its occupancy factor ( $OF$ ).  $OF = (F_0 - F) / (F_0 - F_{max})$ , where  $F$  is fluorescence intensity of the solutions containing of the test antiseptic and BC-LPS solution, BC-Lipid A solution, or BC-LTA solution;  $F_0$  is fluorescence intensity of BC solution;  $F_{max}$  is fluorescence intensity of LPS-bound BC solution, Lipid A-bound BC solution, or LTA-bound BC solution. Each point and vertical bar represents the mean  $\pm$  SD ( $n = 3$ ).
